# Supplementary material for: Neurogranin as an important regulator in swimming training to improve the spatial memory dysfunction of mice with chronic cerebral hypoperfusion
Source: PubMed Central journal article supplement — J Sport Health Sci. 2022 Jan 21;12(1):116–29. doi: 10.1016/j.jshs.2022.01.008 (PMC9923430; doi:10.1016/j.jshs.2022.01.008), 2022-01-21
Supplement: mmc2.pdf [file mmc2.pdf]

**Neurogranin as an important regulator in swimming training to improve the spatial memory dysfunction of mice with chronic cerebral hypoperfusion**

Huawei Lin<sup>1, #</sup>, Jiayong Zhang<sup>1, #</sup>, Yaling Dai<sup>1</sup>, Huanhuan Liu<sup>1</sup>, Xiaojun He<sup>1</sup>, Lewen Chen<sup>1</sup>, Jing Tao<sup>2</sup>, Chaohui Li<sup>3</sup>, Weilin Liu<sup>2, \*</sup>

1 College of Rehabilitation Medicine, Fujian University of Traditional Chinese Medicine, Fuzhou, Fujian 350122, China.

2 Rehabilitation Industry Institute, Fujian University of Traditional Chinese Medicine, Fuzhou, Fujian 350122, China.

3 General surgery, Anxi General Hospital of Traditional Chinese Medicine, Quanzhou, Fujian 362400, China.

<sup>#</sup> These two authors contributed equally to this article.

<sup>\*</sup> Corresponding author.

Email: liuweilin12@fjtcn.edu.cn.

**Running head:** Ng as a regulator in swimming to improve memory.

## Supplementary materials

**Supplementary Table 1. The primer sequences of Ng and Nestin-cre.**

| Gene                              | Sequence                   |
|-----------------------------------|----------------------------|
| Ng gene of forward primer         | CTGGGAGACAGTAGGAACTAGCA    |
| Ng gene of reverse primer         | GAGTTGAGTCTGGAAGAGCAAAGG   |
| Nestin-Cre gene of forward primer | GCAGGCAAATTTTGGTGTACGGTCA  |
| Nestin-Cre gene of reverse primer | GGTGTCTGGCTGTATCTCAAGATTCT |

Abbreviations: Ng = neurogranin.

**Supplementary Table 2. The component of amplification reaction system.**

| Reaction component            | Volume  |
|-------------------------------|---------|
| 2 × Taq Master Mix (Dye Plus) | 12.5 ul |
| ddH <sub>2</sub> O            | 9.5 ul  |
| Forward primer                | 1 ul    |
| Reverse primer                | 1 ul    |
| Template                      | 1 ul    |

**Supplementary Table 3. The procedure of PCR amplification reaction.**

| Step | Temp  | Time  | Cycle      | ± Temp/cycle |
|------|-------|-------|------------|--------------|
| 1    | 95 °C | 5 min |            |              |
| 2    | 98 °C | 30 s  |            |              |
| 3    | 65 °C | 30 s  |            | - 0.5        |
| 4    | 72 °C | 45 s  | 2 - 4, 20× |              |
| 5    | 98 °C | 30 s  |            |              |
| 6    | 55 °C | 30 s  |            |              |
| 7    | 72 °C | 45 s  | 5 - 7, 20× |              |
| 8    | 72 °C | 5 min |            |              |
| 9    | 10 °C | Hold  |            |              |

Abbreviations: PCR = polymerase chain reaction; Temp = temperature.

A

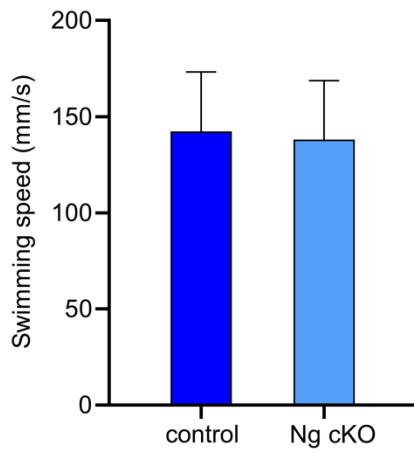

B

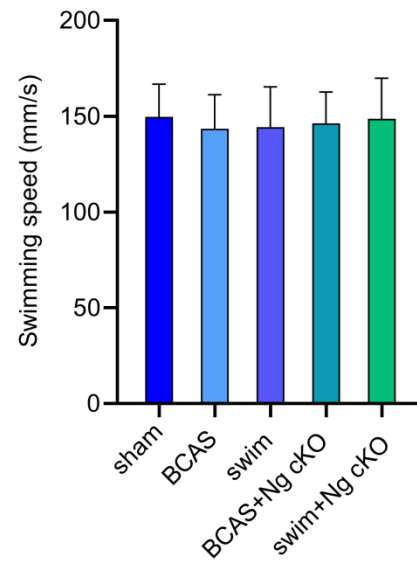

Supplementary Fig. 1. The swimming speeds of all groups in the orientation navigation experiment of MWM. (A) The quantification of swimming speed in control and Ng conditional knockout mice from Experiment 1 ( $n = 9$  per group); (B) The quantification of swimming speed in five groups from Experiment 2 ( $n = 12$  per group). BCAS = bilateral common carotid artery stenosis; MWM = Morris water maze; Ng = neurogranin; Ng cKO = neurogranin conditional knockout.
